# Supplementary material for: Antarctic Tipping points triggered by the mid-Pliocene warm climate
Source: Copernicus journal article supplement (doi:10.5194/cp-2023-76), 2023-09-20
Supplement: Supplementary file 1 [file cp-2023-76-supplement.pdf]

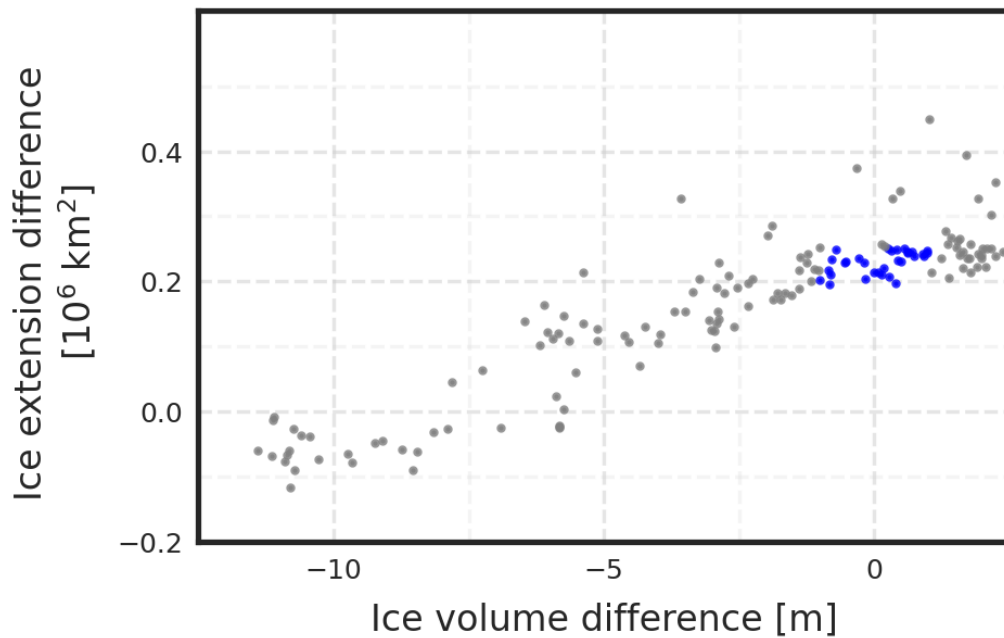

**Figure S1.** Scatter plot of the Antarctic PD simulations. x-axis represents the ice volume difference between the simulated state and the observations. y-axis represents the ice extension difference between the simulation and the observations. Blue points represent simulations that differ less than 1 mSLE and  $2.5 \cdot 10^6 \text{ km}^2$  with observations (a deviation of 2% from observed values) and are considered for mPWP simulations.

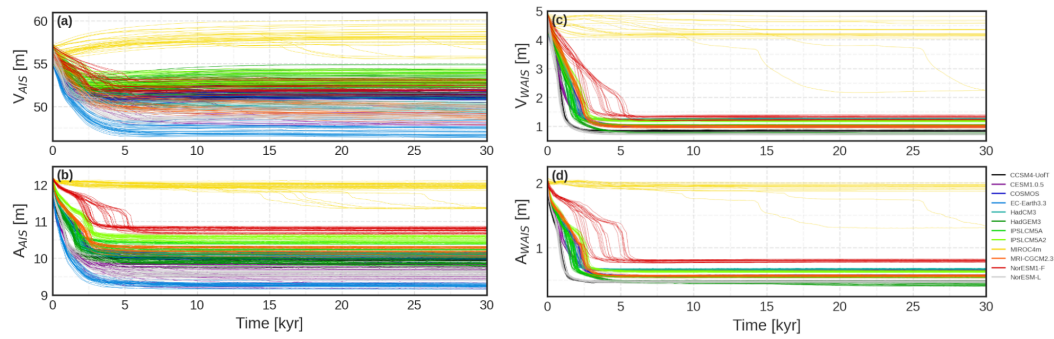

**Figure S2.** Time evolution of the (a)/(c) AIS/WAIS sea-level content; (b)/(d) AIS/WAIS grounded ice area for the whole ensemble.

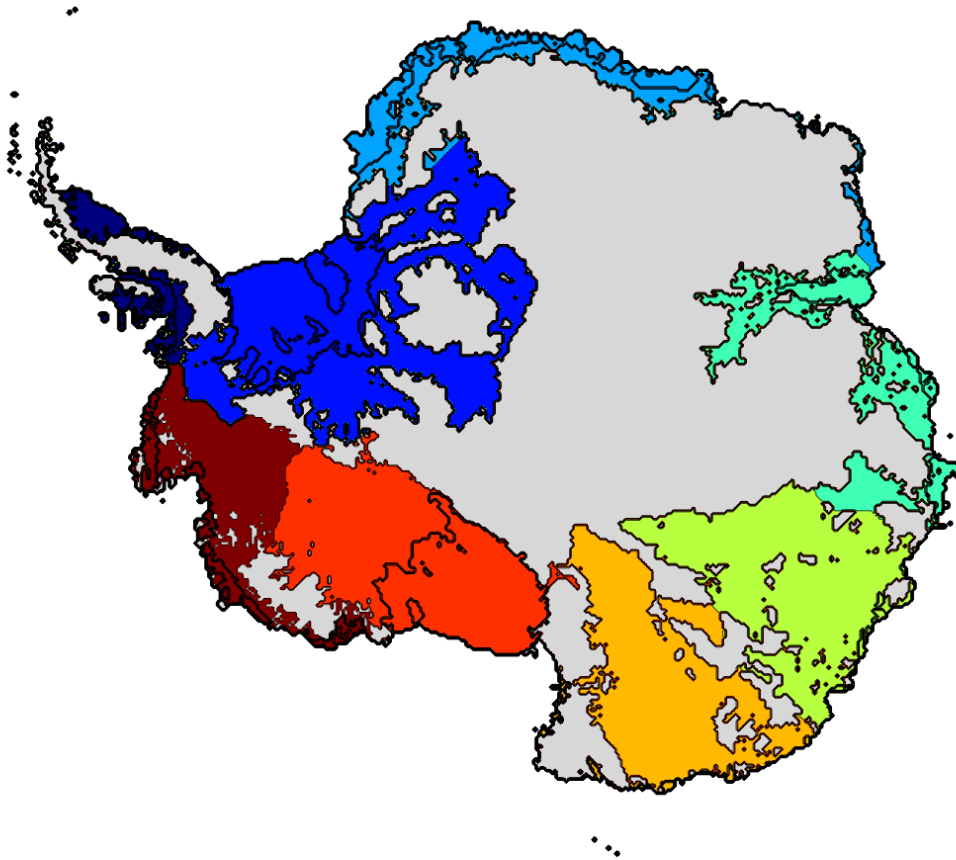

**Figure S3.** Map of the Bedrock AIS regions. Navy blue: Antarctic Peninsula. Dark-blue: Filchner-Ronne. Light-blue: North-EAIS. Turkish: Amery. Green: Totten. Orange: Wilkes. Red: Ross. Dark-Red: Amundsen. Gray colors represent bedrock regions above sea level.

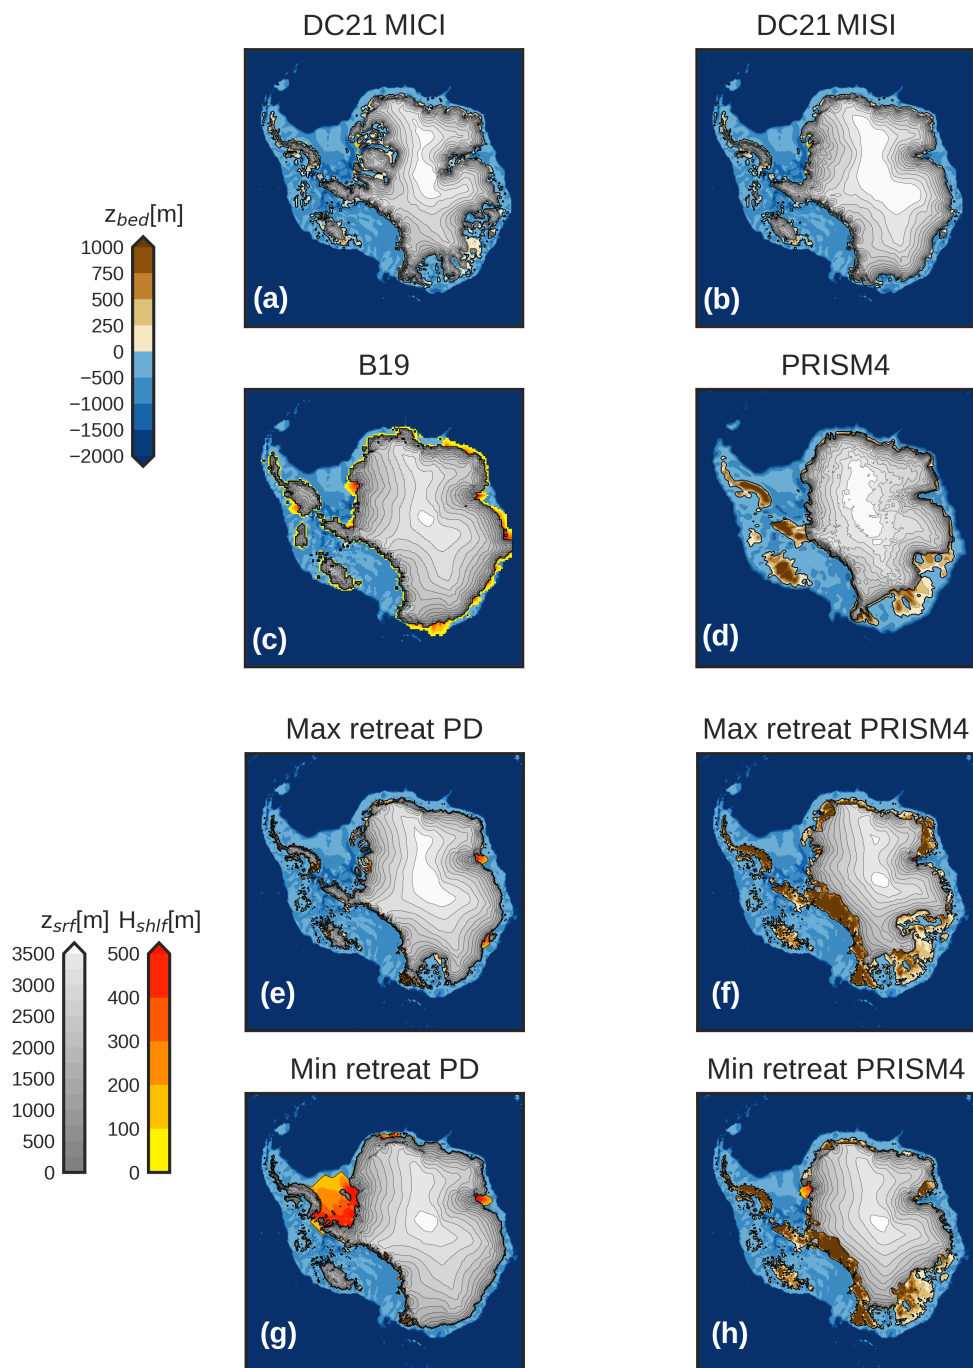

**Figure S4.** AIS reconstruction/simulations from other studies with surface elevation (gray), floating ice thickness (orange) and bedrock elevation for ice-free points (brown/blue). DeConto et al. (2021) with (a) and without (b) MICI mechanism. (c) Berends et al., (2019) and the (d) PRISM4 boundary conditions for Pliocene (Dowsett et al., 2016). (e)/(f) maximum retreated AIS in our study starting from PD/PRISM4 conditions. (g)/(h) minimum retreated AIS in our study starting from PD/PRISM4 conditions.

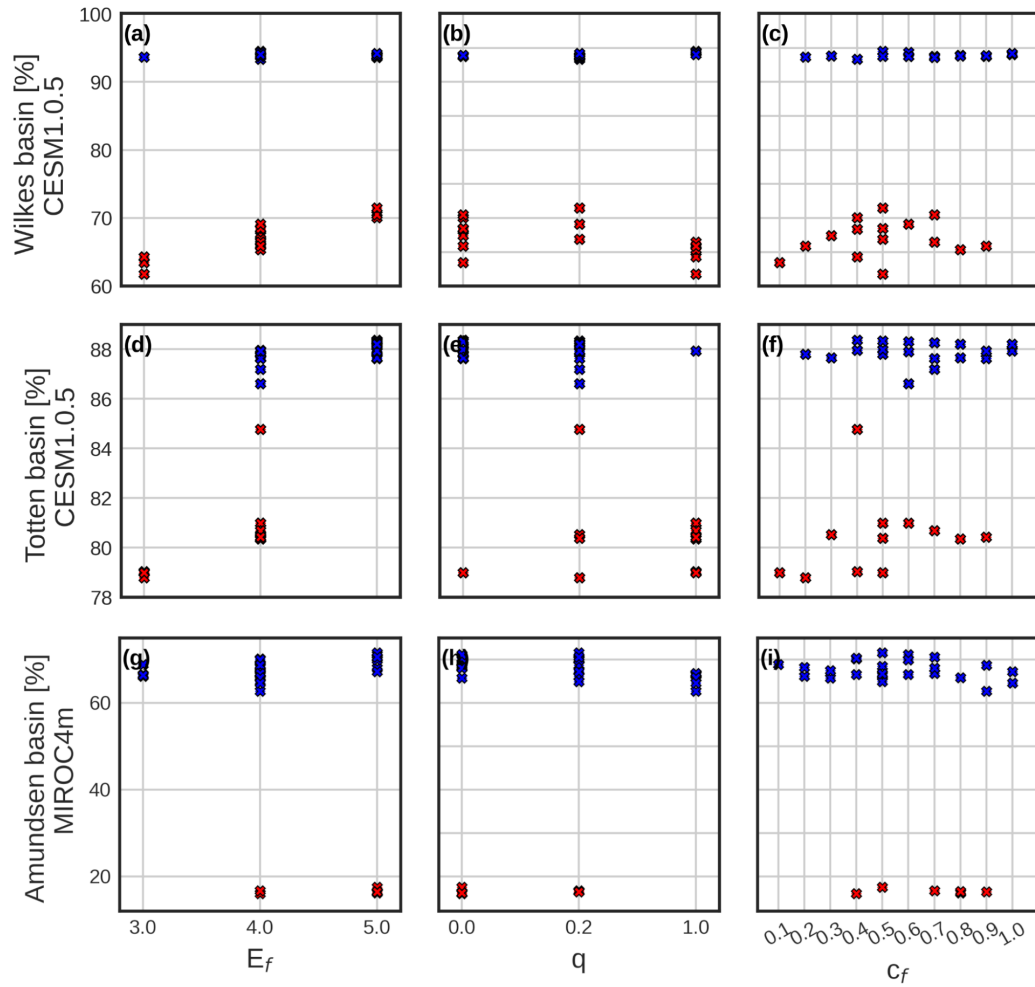

**Figure S5.** Scatter plot of (a)/(d)/(g) enhancement factor; (b)/(e)/(h) Friction law exponent; (c)/(f)/(i) friction coefficient with respect to the Wilkes, Totten and Amundsen basin ice area. Top/Center and Lower row shows the CESM1.0.5/MIROC4m models. Red/Blue colors represent collapsed/non-collapsed states.

| AOGCM       | CMIP6 | Ocean | AIS contribution to sea-level rise (m) | Reference                  |
|-------------|-------|-------|----------------------------------------|----------------------------|
| CCSM4-UofT  | No    | No    | 4.7 <sup>+1.0</sup> <sub>-0.5</sub>    | Chandan and Peltier (2017) |
| CESM1.0.5   | No    | Yes   | 5.8 <sup>+3.0</sup> <sub>-2.1</sub>    | Baatsen et al. (2022)      |
| COSMOS      | No    | Yes   | 4.7 <sup>+0.7</sup> <sub>-0.4</sub>    | Stepanek et al. (2020)     |
| EC-Earth3.3 | Yes   | Yes   | 8.9 <sup>+0.8</sup> <sub>-0.7</sub>    | Zhang et al. (2021)        |
| HadCM3      | No    | Yes   | 5.8 <sup>+0.9</sup> <sub>-0.5</sub>    | Hunter et al. (2019)       |
| HadGEM3     | Yes   | Yes   | 2.7 <sup>+0.9</sup> <sub>-0.5</sub>    | Williams et al. (2021)     |
| IPSLCM5A    | No    | No    | 3.3 <sup>+0.4</sup> <sub>-0.5</sub>    | Tan et al. (2020)          |
| IPSLCM5A2   | No    | No    | 2.9 <sup>+0.5</sup> <sub>-0.3</sub>    | Tan et al. (2020)          |
| MIROC4m     | No    | Yes   | -1.8 <sup>+1.9</sup> <sub>-1.0</sub>   | Chan and Abe-Ouchi (2020)  |
| MRI-CGCM2.3 | No    | No    | 7.0 <sup>+0.3</sup> <sub>-0.4</sub>    | Kamae et al. (2016)        |
| NorESM1-F   | No    | Yes   | 4.0 <sup>+0.5</sup> <sub>-0.7</sub>    | Li et al. (2020)           |
| NorESM-L    | No    | Yes   | 6.9 <sup>+0.5</sup> <sub>-0.2</sub>    | Li et al. (2020)           |

**Table S1.** Table summarizing the AOGCMs, its contribution to CMIP6, if ocean files are available and the contribution in this study to sea-level rise.

## References

- Baatsen, M. L., von der Heydt, A. S., Kliphuis, M. A., Oldeman, A. M., and Weiffenbach, J. E.: Warm mid-Pliocene conditions without high climate sensitivity: the CCSM4-Utrecht (CESM 1.0. 5) contribution to the PlioMIP2, *Climate of the Past*, 18, 657–679, <https://doi.org/10.5194/cp-18-657-2022>, 2022.
- 5 Chan, W.-L. and Abe-Ouchi, A.: Pliocene Model Intercomparison Project (PlioMIP2) simulations using the Model for Interdisciplinary Research on Climate (MIROC4m), *Climate of the Past*, 16, 1523–1545, <https://doi.org/10.5194/cp-16-1523-2020>, 2020.
- Chandan, D. and Peltier, W. R.: Regional and global climate for the mid-Pliocene using the University of Toronto version of CCSM4 and PlioMIP2 boundary conditions, *Climate of the Past*, 13, 919–942, <https://doi.org/10.5194/cp-13-919-2017>, 2017.
- 10 Hunter, S. J., Haywood, A. M., Dolan, A. M., and Tindall, J. C.: The HadCM3 contribution to PlioMIP phase 2, *Climate of the Past*, 15, 1691–1713, <https://doi.org/10.5194/cp-15-1691-2019>, 2019.
- Kamae, Y., Yoshida, K., and Ueda, H.: Sensitivity of Pliocene climate simulations in MRI-CGCM2. 3 to respective boundary conditions, *Climate of the Past*, 12, 1619–1634, <https://doi.org/10.5194/cp-12-1619-2016>, 2016.
- 15 Li, X., Guo, C., Zhang, Z., Otterå, O. H., and Zhang, R.: PlioMIP2 simulations with NorESM-L and NorESM1-F, *Climate of the Past*, 16, 183–197, <https://doi.org/10.5194/cp-16-183-2020>, 2020.
- Stepanek, C., Samakinwa, E., Knorr, G., and Lohmann, G.: Contribution of the coupled atmosphere–ocean–sea ice–vegetation model COSMOS to the PlioMIP2, *Climate of the Past*, 16, 2275–2323, <https://doi.org/10.5194/cp-16-2275-2020>, 2020.
- Tan, N., Contoux, C., Ramstein, G., Sun, Y., Dumas, C., Sepulchre, P., and Guo, Z.: Modeling a modern-like p CO<sub>2</sub> warm period (Marine Isotope Stage KM5c) with two versions of an Institut Pierre Simon Laplace atmosphere–ocean coupled general circulation model, *Climate of the Past*, 16, 1–16, <https://doi.org/10.5194/cp-16-1-2020>, 2020.
- 20 Williams, C. J., Sellar, A. A., Ren, X., Haywood, A. M., Hopcroft, P., Hunter, S. J., Roberts, W. H., Smith, R. S., Stone, E. J., Tindall, J. C., et al.: Simulation of the mid-Pliocene Warm Period using HadGEM3: experimental design and results from model–model and model–data comparison, *Climate of the Past*, 17, 2139–2163, <https://doi.org/10.5194/cp-17-2139-2021>, 2021.
- Zhang, Q., Berntell, E., Axelsson, J., Chen, J., Han, Z., De Nooijer, W., Lu, Z., Li, Q., Zhang, Q., Wyser, K., et al.: Simulating the mid-Holocene, last interglacial and mid-Pliocene climate with EC-Earth3-LR, *Geoscientific Model Development*, 14, 1147–1169, <https://doi.org/10.5194/gmd-14-1147-2021>, 2021.
- 25
